# Supplementary material for: Molecular Detection of Metronidazole and Tetracycline Resistance Genes in Helicobacter pylori-Like Positive Gastric Samples from Pigs
Source: MDPI journal article supplement (doi:10.3390/antibiotics12050906), 2023-05-13
Supplement: s1 [file s1]

## Supplementary Materials

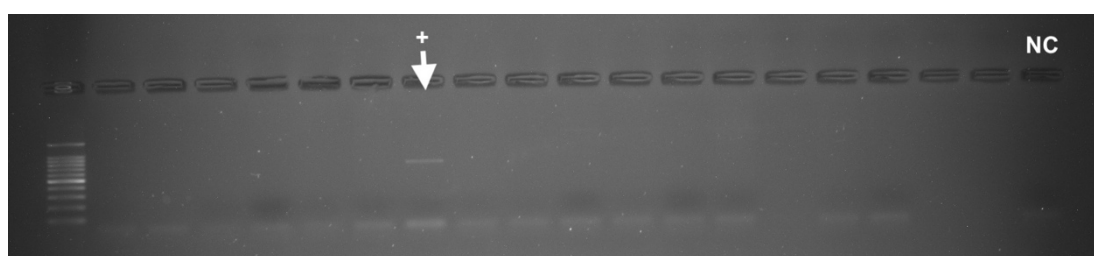

**Figure S1.** *frxA* PCR products electrophoresis gel; +: *frxA* positive sample; NC - Negative control

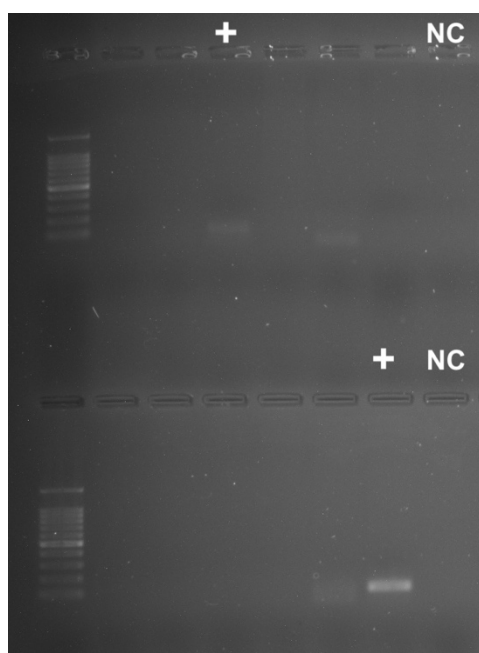

**Figure S2.** 16S *rRNA* PCR products electrophoresis gel; +: 16S *rRNA* positive samples confirmed by sequencing ; NC - Negative control

| Descriptions                                                               | Graphic Summary     | Alignments | Taxonomy    |             |         |            |          |            |
|----------------------------------------------------------------------------|---------------------|------------|-------------|-------------|---------|------------|----------|------------|
| Sequences producing significant alignments                                 |                     |            |             |             |         |            |          |            |
| Download Select columns Show 100                                           |                     |            |             |             |         |            |          |            |
| select all 100 sequences selected                                          |                     |            |             |             |         |            |          |            |
| GenBank Graphics Distance tree of results MSA Viewer                       |                     |            |             |             |         |            |          |            |
| Description                                                                | Scientific Name     | Max Score  | Total Score | Query Cover | E value | Per. Ident | Acc. Len | Accession  |
| Helicobacter pylori strain ALI572 16S ribosomal RNA gene, partial sequence | Helicobacter pylori | 130        | 130         | 97%         | 2e-26   | 98.63%     | 1011     | OP389222.1 |
| Helicobacter pylori strain ALI514 16S ribosomal RNA gene, partial sequence | Helicobacter pylori | 130        | 130         | 97%         | 2e-26   | 98.63%     | 980      | OP389221.1 |
| Helicobacter pylori strain ALI14 16S ribosomal RNA gene, partial sequence  | Helicobacter pylori | 130        | 130         | 97%         | 2e-26   | 98.63%     | 980      | OP389218.1 |
| Helicobacter pylori strain ALI12 16S ribosomal RNA gene, partial sequence  | Helicobacter pylori | 130        | 130         | 97%         | 2e-26   | 98.63%     | 980      | OP389217.1 |
| Helicobacter pylori strain ALI5 16S ribosomal RNA gene, partial sequence   | Helicobacter pylori | 130        | 130         | 97%         | 2e-26   | 98.63%     | 1503     | OP389216.1 |
| Helicobacter pylori strain SA514 16S ribosomal RNA gene, partial sequence  | Helicobacter pylori | 130        | 130         | 97%         | 2e-26   | 98.63%     | 1503     | OP225843.1 |
| Helicobacter pylori strain Hpfe0001 chromosome, complete genome            | Helicobacter pylori | 130        | 260         | 97%         | 2e-26   | 98.63%     | 1649959  | CP094173.1 |
| Helicobacter pylori strain Hpfe0002 chromosome, complete genome            | Helicobacter pylori | 130        | 260         | 97%         | 2e-26   | 98.63%     | 1615483  | CP094172.1 |
| Helicobacter pylori strain Hpfe0003 chromosome, complete genome            | Helicobacter pylori | 130        | 260         | 97%         | 2e-26   | 98.63%     | 1564612  | CP094171.1 |
| Helicobacter pylori strain Hpfe0004 chromosome, complete genome            | Helicobacter pylori | 130        | 260         | 97%         | 2e-26   | 98.63%     | 1560176  | CP094170.1 |
| Helicobacter pylori strain Hpfe0006 chromosome, complete genome            | Helicobacter pylori | 130        | 260         | 97%         | 2e-26   | 98.63%     | 1559683  | CP094168.1 |
| Helicobacter pylori strain Hpfe0007 chromosome, complete genome            | Helicobacter pylori | 130        | 260         | 97%         | 2e-26   | 98.63%     | 1562288  | CP094167.1 |
| Helicobacter pylori strain Hpfe0008 chromosome                             | Helicobacter pylori | 130        | 260         | 97%         | 2e-26   | 98.63%     | 1607782  | CP094179.1 |
| Helicobacter pylori strain Hpfe0011 chromosome, complete genome            | Helicobacter pylori | 130        | 260         | 97%         | 2e-26   | 98.63%     | 1621962  | CP094165.1 |
| Helicobacter pylori strain Hpfe0012 chromosome, complete genome            | Helicobacter pylori | 130        | 260         | 97%         | 2e-26   | 98.63%     | 1627796  | CP094164.1 |
| Helicobacter pylori strain Hpfe0013 chromosome, complete genome            | Helicobacter pylori | 130        | 260         | 97%         | 2e-26   | 98.63%     | 1613739  | CP094163.1 |
| Helicobacter pylori strain Hpfe0015 chromosome, complete genome            | Helicobacter pylori | 130        | 260         | 97%         | 2e-26   | 98.63%     | 1559327  | CP094161.1 |
| Helicobacter pylori strain Hpfe0016 chromosome, complete genome            | Helicobacter pylori | 130        | 260         | 97%         | 2e-26   | 98.63%     | 1564699  | CP094160.1 |
| Helicobacter pylori strain Hpfe0020 chromosome, complete genome            | Helicobacter pylori | 130        | 260         | 97%         | 2e-26   | 98.63%     | 1576980  | CP094159.1 |
| Helicobacter pylori strain Hpfe0021 chromosome, complete genome            | Helicobacter pylori | 130        | 260         | 97%         | 2e-26   | 98.63%     | 1615407  | CP094157.1 |
| Helicobacter pylori strain Hpfe005 chromosome, complete genome             | Helicobacter pylori | 130        | 260         | 97%         | 2e-26   | 98.63%     | 1595694  | CP094156.1 |

Figure S3. Results of the basic alignment research tool for sequenced sample 1, 16s rRNA gene.

| Descriptions                                                               | Graphic Summary | Alignments | Taxonomy    |             |         |            |          |            |
|----------------------------------------------------------------------------|-----------------|------------|-------------|-------------|---------|------------|----------|------------|
| Sequences producing significant alignments                                 |                 |            |             |             |         |            |          |            |
| Download Select columns Show 100                                           |                 |            |             |             |         |            |          |            |
| select all 100 sequences selected                                          |                 |            |             |             |         |            |          |            |
| GenBank Graphics Distance tree of results MSA Viewer                       |                 |            |             |             |         |            |          |            |
| Description                                                                | Scientific Name | Max Score  | Total Score | Query Cover | E value | Per. Ident | Acc. Len | Accession  |
| Helicobacter pylori strain ALI572 16S ribosomal RNA gene, partial sequence | Helicobacter... | 93.5       | 93.5        | 98%         | 1e-15   | 100.00%    | 1011     | OP389222.1 |
| Helicobacter pylori strain ALI514 16S ribosomal RNA gene, partial sequence | Helicobacter... | 93.5       | 93.5        | 98%         | 1e-15   | 100.00%    | 980      | OP389221.1 |
| Helicobacter pylori strain ALI14 16S ribosomal RNA gene, partial sequence  | Helicobacter... | 93.5       | 93.5        | 98%         | 1e-15   | 100.00%    | 980      | OP389218.1 |
| Helicobacter pylori strain ALI12 16S ribosomal RNA gene, partial sequence  | Helicobacter... | 93.5       | 93.5        | 98%         | 1e-15   | 100.00%    | 980      | OP389217.1 |
| Helicobacter pylori strain ALI5 16S ribosomal RNA gene, partial sequence   | Helicobacter... | 93.5       | 93.5        | 98%         | 1e-15   | 100.00%    | 1503     | OP389216.1 |
| Helicobacter pylori strain SA514 16S ribosomal RNA gene, partial sequence  | Helicobacter... | 93.5       | 93.5        | 98%         | 1e-15   | 100.00%    | 1503     | OP225843.1 |
| Helicobacter pylori strain Hpfe0001 chromosome, complete genome            | Helicobacter... | 93.5       | 186         | 98%         | 1e-15   | 100.00%    | 1649959  | CP094173.1 |
| Helicobacter pylori strain Hpfe0002 chromosome, complete genome            | Helicobacter... | 93.5       | 186         | 98%         | 1e-15   | 100.00%    | 1615483  | CP094172.1 |
| Helicobacter pylori strain Hpfe0003 chromosome, complete genome            | Helicobacter... | 93.5       | 186         | 98%         | 1e-15   | 100.00%    | 1564612  | CP094171.1 |
| Helicobacter pylori strain Hpfe0004 chromosome, complete genome            | Helicobacter... | 93.5       | 186         | 98%         | 1e-15   | 100.00%    | 1560176  | CP094170.1 |
| Helicobacter pylori strain Hpfe0006 chromosome, complete genome            | Helicobacter... | 93.5       | 186         | 98%         | 1e-15   | 100.00%    | 1559683  | CP094168.1 |
| Helicobacter pylori strain Hpfe0007 chromosome, complete genome            | Helicobacter... | 93.5       | 186         | 98%         | 1e-15   | 100.00%    | 1562288  | CP094167.1 |
| Helicobacter pylori strain Hpfe0008 chromosome                             | Helicobacter... | 93.5       | 186         | 98%         | 1e-15   | 100.00%    | 1607782  | CP094179.1 |
| Helicobacter pylori strain Hpfe0011 chromosome, complete genome            | Helicobacter... | 93.5       | 186         | 98%         | 1e-15   | 100.00%    | 1621962  | CP094165.1 |
| Helicobacter pylori strain Hpfe0012 chromosome, complete genome            | Helicobacter... | 93.5       | 186         | 98%         | 1e-15   | 100.00%    | 1627796  | CP094164.1 |
| Helicobacter pylori strain Hpfe0013 chromosome, complete genome            | Helicobacter... | 93.5       | 186         | 98%         | 1e-15   | 100.00%    | 1613739  | CP094163.1 |
| Helicobacter pylori strain Hpfe0015 chromosome, complete genome            | Helicobacter... | 93.5       | 186         | 98%         | 1e-15   | 100.00%    | 1559327  | CP094161.1 |
| Helicobacter pylori strain Hpfe0016 chromosome, complete genome            | Helicobacter... | 93.5       | 186         | 98%         | 1e-15   | 100.00%    | 1564699  | CP094160.1 |
| Helicobacter pylori strain Hpfe0020 chromosome, complete genome            | Helicobacter... | 93.5       | 186         | 98%         | 1e-15   | 100.00%    | 1576980  | CP094159.1 |
| Helicobacter pylori strain Hpfe0021 chromosome, complete genome            | Helicobacter... | 93.5       | 186         | 98%         | 1e-15   | 100.00%    | 1615407  | CP094157.1 |
| Helicobacter pylori strain Hpfe005 chromosome, complete genome             | Helicobacter... | 93.5       | 186         | 98%         | 1e-15   | 100.00%    | 1595694  | CP094155.1 |

Figure S4. Results of the basic alignment research tool for sequenced sample 2, 16s rRNA gene.

| CARD                                                                                                  |                             |                                                                                             |               |          |                                           |                      |
|-------------------------------------------------------------------------------------------------------|-----------------------------|---------------------------------------------------------------------------------------------|---------------|----------|-------------------------------------------|----------------------|
| Use or Download Copyright & Disclaimer                                                                |                             |                                                                                             |               |          |                                           |                      |
| Help Us Curate: <a href="https://github.com/arpcard/amr_curation">github.com/arpcard/amr_curation</a> |                             |                                                                                             |               |          |                                           |                      |
| <a href="#">Browse</a> <a href="#">Analyze</a> <a href="#">Download</a> <a href="#">About</a>         |                             |                                                                                             |               |          |                                           |                      |
| <input type="text" value="Search"/>                                                                   |                             |                                                                                             |               |          |                                           |                      |
| Show 10 entries                                                                                       |                             |                                                                                             |               |          |                                           |                      |
| Bitscore                                                                                              | ARO tag                     | Name                                                                                        | Evalue        | Identity | Species                                   | Alignment            |
| 42                                                                                                    | <a href="#">ARO:3003510</a> | <a href="#">Helicobacter pylori 16S rRNA mutation conferring resistance to tetracycline</a> | 0.00000367872 | 100      | <a href="#">Helicobacter pylori 26695</a> | <a href="#">View</a> |
| 41                                                                                                    | <a href="#">ARO:3003510</a> | <a href="#">Helicobacter pylori 16S rRNA mutation conferring resistance to tetracycline</a> | 0.0000103761  | 94       | <a href="#">Helicobacter pylori 26695</a> | <a href="#">View</a> |
| 40                                                                                                    | <a href="#">ARO:3003510</a> | <a href="#">Helicobacter pylori 16S rRNA mutation conferring resistance to tetracycline</a> | 0.0000173553  | 94       | <a href="#">Helicobacter pylori 26695</a> | <a href="#">View</a> |

Figure S5. CARD analysis of PCR-positive samples for 16s rRNA gene, sample 1.

| CARD                                                                                                  |                             |                                                                                             |              |          |                                           |                      |
|-------------------------------------------------------------------------------------------------------|-----------------------------|---------------------------------------------------------------------------------------------|--------------|----------|-------------------------------------------|----------------------|
| Use or Download Copyright & Disclaimer                                                                |                             |                                                                                             |              |          |                                           |                      |
| Help Us Curate: <a href="https://github.com/arpcard/amr_curation">github.com/arpcard/amr_curation</a> |                             |                                                                                             |              |          |                                           |                      |
| <a href="#">Browse</a> <a href="#">Analyze</a> <a href="#">Download</a> <a href="#">About</a>         |                             |                                                                                             |              |          |                                           |                      |
| <input type="text" value="Search"/>                                                                   |                             |                                                                                             |              |          |                                           |                      |
| Show 10 entries                                                                                       |                             |                                                                                             |              |          |                                           |                      |
| Bitscore                                                                                              | ARO tag                     | Name                                                                                        | Evalue       | Identity | Species                                   | Alignment            |
| 41                                                                                                    | <a href="#">ARO:3003510</a> | <a href="#">Helicobacter pylori 16S rRNA mutation conferring resistance to tetracycline</a> | 0.0000100608 | 100      | <a href="#">Helicobacter pylori 26695</a> | <a href="#">View</a> |
| 40                                                                                                    | <a href="#">ARO:3003510</a> | <a href="#">Helicobacter pylori 16S rRNA mutation conferring resistance to tetracycline</a> | 0.0000238433 | 100      | <a href="#">Helicobacter pylori 26695</a> | <a href="#">View</a> |
| 39                                                                                                    | <a href="#">ARO:3003510</a> | <a href="#">Helicobacter pylori 16S rRNA mutation conferring resistance to tetracycline</a> | 0.0000327567 | 100      | <a href="#">Helicobacter pylori 26695</a> | <a href="#">View</a> |
| 39                                                                                                    | <a href="#">ARO:3003510</a> | <a href="#">Helicobacter pylori 16S rRNA mutation conferring resistance to tetracycline</a> | 0.0000450023 | 100      | <a href="#">Helicobacter pylori 26695</a> | <a href="#">View</a> |

Figure S6. CARD analysis of PCR-positive samples for 16s rRNA gene, sample 2.

blast.ncbi.nlm.nih.gov/Blast.cgi

Sequences producing significant alignments

Download Select columns Show 100

☒ select all 100 sequences selected

GenBank Graphics Distance tree of results MSA Viewer

| Description                                                                                                               | Scientific Name                          | Max Score | Total Score | Query Cover | E value | Per. Ident | Acc. Len | Accession                  |
|---------------------------------------------------------------------------------------------------------------------------|------------------------------------------|-----------|-------------|-------------|---------|------------|----------|----------------------------|
| <input checked="" type="checkbox"/> <a href="#">Helicobacter pylori strain dRdM2addM2 chromosome, complete genome</a>     | <a href="#">Helicobacter pylori</a>      | 1230      | 1230        | 92%         | 0.0     | 99.41%     | 1668735  | <a href="#">CP026515.1</a> |
| <input checked="" type="checkbox"/> <a href="#">Helicobacter pylori strain 26695-dR chromosome, complete genome</a>       | <a href="#">Helicobacter pylori</a>      | 1230      | 1230        | 92%         | 0.0     | 99.41%     | 1666471  | <a href="#">CP026326.1</a> |
| <input checked="" type="checkbox"/> <a href="#">Helicobacter pylori strain 26695-dRdM1dM2 chromosome, complete genome</a> | <a href="#">Helicobacter pylori</a>      | 1230      | 1230        | 92%         | 0.0     | 99.41%     | 1666879  | <a href="#">CP026323.1</a> |
| <input checked="" type="checkbox"/> <a href="#">Helicobacter pylori strain 26695-dRdM2 chromosome, complete genome</a>    | <a href="#">Helicobacter pylori</a>      | 1230      | 1230        | 92%         | 0.0     | 99.41%     | 1666735  | <a href="#">CP026324.1</a> |
| <input checked="" type="checkbox"/> <a href="#">Helicobacter pylori strain dRdM1 chromosome, complete genome</a>          | <a href="#">Helicobacter pylori</a>      | 1230      | 1230        | 92%         | 0.0     | 99.41%     | 1670779  | <a href="#">CP026325.1</a> |
| <input checked="" type="checkbox"/> <a href="#">Helicobacter pylori 26695-1CL DNA, complete genome</a>                    | <a href="#">Helicobacter pylori 2...</a> | 1230      | 1230        | 92%         | 0.0     | 99.41%     | 1667239  | <a href="#">AP013356.1</a> |
| <input checked="" type="checkbox"/> <a href="#">Helicobacter pylori 26695-1CH DNA, complete genome</a>                    | <a href="#">Helicobacter pylori 2...</a> | 1230      | 1230        | 92%         | 0.0     | 99.41%     | 1667302  | <a href="#">AP013355.1</a> |
| <input checked="" type="checkbox"/> <a href="#">Helicobacter pylori 26695-1 DNA, complete genome</a>                      | <a href="#">Helicobacter pylori 2...</a> | 1230      | 1230        | 92%         | 0.0     | 99.41%     | 1667638  | <a href="#">AP013354.1</a> |
| <input checked="" type="checkbox"/> <a href="#">Helicobacter pylori R/f2, complete genome</a>                             | <a href="#">Helicobacter pylori R...</a> | 1230      | 1230        | 92%         | 0.0     | 99.41%     | 1667890  | <a href="#">CP003906.1</a> |
| <input checked="" type="checkbox"/> <a href="#">Helicobacter pylori R/f1, complete genome</a>                             | <a href="#">Helicobacter pylori R...</a> | 1230      | 1230        | 92%         | 0.0     | 99.41%     | 1667883  | <a href="#">CP003905.1</a> |
| <input checked="" type="checkbox"/> <a href="#">Helicobacter pylori 26695, complete genome</a>                            | <a href="#">Helicobacter pylori 2...</a> | 1230      | 1230        | 92%         | 0.0     | 99.41%     | 1667892  | <a href="#">CP003904.1</a> |
| <input checked="" type="checkbox"/> <a href="#">Helicobacter pylori 26695, complete genome</a>                            | <a href="#">Helicobacter pylori 2...</a> | 1230      | 1230        | 92%         | 0.0     | 99.41%     | 1667867  | <a href="#">AE000511.1</a> |
| <input checked="" type="checkbox"/> <a href="#">Helicobacter pylori strain 26695-1MET, complete genome</a>                | <a href="#">Helicobacter pylori</a>      | 1221      | 1221        | 92%         | 0.0     | 99.12%     | 1667303  | <a href="#">CP010436.1</a> |
| <input checked="" type="checkbox"/> <a href="#">Helicobacter pylori strain 476-A2-EK2 chromosome, complete genome</a>     | <a href="#">Helicobacter pylori</a>      | 1192      | 1192        | 92%         | 0.0     | 98.38%     | 1649543  | <a href="#">CP032473.1</a> |
| <input checked="" type="checkbox"/> <a href="#">Helicobacter pylori strain 173-A-EK1 chromosome, complete genome</a>      | <a href="#">Helicobacter pylori</a>      | 1190      | 1190        | 92%         | 0.0     | 98.38%     | 1690720  | <a href="#">CP032903.1</a> |
| <input checked="" type="checkbox"/> <a href="#">Helicobacter pylori strain 24-A-EK1 chromosome, complete genome</a>       | <a href="#">Helicobacter pylori</a>      | 1186      | 1186        | 92%         | 0.0     | 98.24%     | 1659500  | <a href="#">CP032907.1</a> |
| <input checked="" type="checkbox"/> <a href="#">Helicobacter pylori strain NCTC12823 genome assembly, chromosome:1</a>    | <a href="#">Helicobacter pylori</a>      | 1186      | 1186        | 92%         | 0.0     | 98.24%     | 1632224  | <a href="#">LR134519.1</a> |
| <input checked="" type="checkbox"/> <a href="#">Helicobacter pylori strain Hp6-IRAN FrxA gene, complete cds</a>           | <a href="#">Helicobacter pylori</a>      | 1186      | 1186        | 88%         | 0.0     | 99.54%     | 654      | <a href="#">KT232265.1</a> |
| <input checked="" type="checkbox"/> <a href="#">Helicobacter pylori strain LIM-006 chromosome, complete genome</a>        | <a href="#">Helicobacter pylori</a>      | 1186      | 1186        | 92%         | 0.0     | 98.24%     | 1745296  | <a href="#">CP051493.1</a> |
| <input checked="" type="checkbox"/> <a href="#">Helicobacter pylori strain B147 chromosome, complete genome</a>           | <a href="#">Helicobacter pylori</a>      | 1181      | 1181        | 91%         | 0.0     | 98.23%     | 1631093  | <a href="#">CP024946.1</a> |
| <input checked="" type="checkbox"/> <a href="#">Helicobacter pylori strain 169-A-EK5 chromosome, complete genome</a>      | <a href="#">Helicobacter pylori</a>      | 1181      | 1181        | 92%         | 0.0     | 98.09%     | 1610187  | <a href="#">CP032904.1</a> |
| <input checked="" type="checkbox"/> <a href="#">Helicobacter pylori strain 476-A-EK5 chromosome, complete genome</a>      | <a href="#">Helicobacter pylori</a>      | 1181      | 1181        | 92%         | 0.0     | 98.09%     | 1634797  | <a href="#">CP032900.1</a> |

Figure S7. Results of the basic alignment research tool for sequenced sample, *frxA*

CARD

Use or Download Copyright & Disclaimer

Help Us Curate: [github.com/arpcard/amr\\_curation](https://github.com/arpcard/amr_curation)

Browse Analyze Download About

Search

Show 10 entries

| Bitscore | ARO tag                     | Name                                                                                     | Evalue       | Identity | Species                                   | Alignment            |
|----------|-----------------------------|------------------------------------------------------------------------------------------|--------------|----------|-------------------------------------------|----------------------|
| 485      | <a href="#">ARO:3007059</a> | <a href="#">Helicobacter pylori frxA mutation conferring resistance to metronidazole</a> | 3.3928e-138  | 100      | <a href="#">Helicobacter pylori 26695</a> | <a href="#">View</a> |
| 461      | <a href="#">ARO:3007059</a> | <a href="#">Helicobacter pylori frxA mutation conferring resistance to metronidazole</a> | 9.57515e-131 | 100      | <a href="#">Helicobacter pylori 26695</a> | <a href="#">View</a> |
| 418      | <a href="#">ARO:3007059</a> | <a href="#">Helicobacter pylori frxA mutation conferring resistance to metronidazole</a> | 8.80777e-118 | 100      | <a href="#">Helicobacter pylori 26695</a> | <a href="#">View</a> |
| 318      | <a href="#">ARO:3007059</a> | <a href="#">Helicobacter pylori frxA mutation conferring resistance to metronidazole</a> | 2.33713e-115 | 100      | <a href="#">Helicobacter pylori 26695</a> | <a href="#">View</a> |
| 275      | <a href="#">ARO:3007059</a> | <a href="#">Helicobacter pylori frxA mutation conferring resistance to metronidazole</a> | 2.898e-129   | 100      | <a href="#">Helicobacter pylori 26695</a> | <a href="#">View</a> |
| 238      | <a href="#">ARO:3007059</a> | <a href="#">Helicobacter pylori frxA mutation conferring resistance to metronidazole</a> | 4.52394e-112 | 100      | <a href="#">Helicobacter pylori 26695</a> | <a href="#">View</a> |
| 201      | <a href="#">ARO:3007059</a> | <a href="#">Helicobacter pylori frxA mutation conferring resistance to metronidazole</a> | 2.898e-129   | 100      | <a href="#">Helicobacter pylori 26695</a> | <a href="#">View</a> |
| 108      | <a href="#">ARO:3007059</a> | <a href="#">Helicobacter pylori frxA mutation conferring resistance to metronidazole</a> | 4.52394e-112 | 97       | <a href="#">Helicobacter pylori 26695</a> | <a href="#">View</a> |
| 102      | <a href="#">ARO:3007059</a> | <a href="#">Helicobacter pylori frxA mutation conferring resistance to metronidazole</a> | 2.33713e-115 | 100      | <a href="#">Helicobacter pylori 26695</a> | <a href="#">View</a> |
| 92       | <a href="#">ARO:3007059</a> | <a href="#">Helicobacter pylori frxA mutation</a>                                        | 4.52394e-    | 100      | <a href="#">Helicobacter</a>              | <a href="#">View</a> |

Figure S8. CARD analysis of the *frxA* mutation gene positive sample sequence.

| Results (all Loose hits shown) |                                                                          |      |                       |                                                         |                           |                              |                               |                                |
|--------------------------------|--------------------------------------------------------------------------|------|-----------------------|---------------------------------------------------------|---------------------------|------------------------------|-------------------------------|--------------------------------|
| Search: <input type="text"/>   |                                                                          |      |                       |                                                         |                           |                              |                               |                                |
| RGI Criteria                   | ARO Term                                                                 | SNP  | Detection Criteria    | AMR Gene Family                                         | Drug Class                | Resistance Mechanism         | % Identity of Matching Region | % Length of Reference Sequence |
| Strict                         | Helicobacter pylori frxA mutation conferring resistance to metronidazole | Y62D | protein variant model | Antibiotic resistant Helicobacter pylori nitroreductase | nitroimidazole antibiotic | antibiotic target alteration | 99.07                         | 108.29                         |
| Previous <span>1</span> Next   |                                                                          |      |                       |                                                         |                           |                              |                               |                                |

**Figure S9.** Resistance gene identifier analysis of the *frxA* mutation gene positive sample sequence

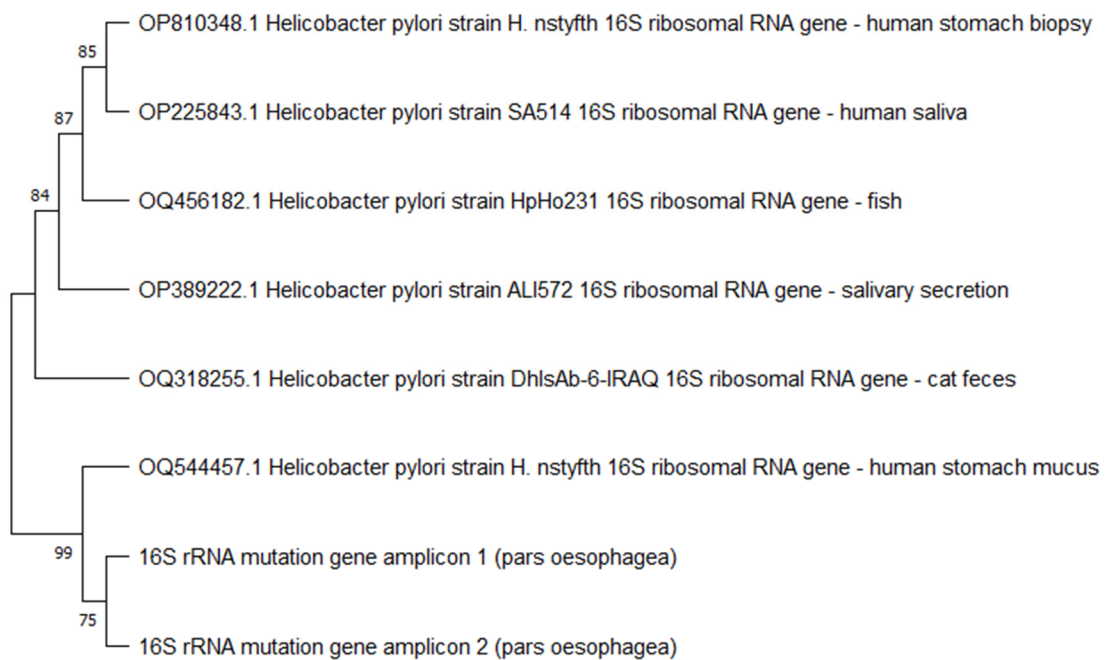

**Figure S10.** Phylogenetic tree based on comparison of 16S rRNA gene sequences.

The evolutionary history was inferred using the Neighbor-Joining method [1]. The bootstrap consensus tree inferred from 1000 replicates [2] is taken to represent the evolutionary history of the taxa analyzed [2]. Branches corresponding to partitions reproduced in less than 50% bootstrap replicates are collapsed. The percentage of replicate trees in which the associated taxa clustered together in the bootstrap test (1000 replicates) are shown next to the branches [2]. The evolutionary distances were computed using the Maximum Composite Likelihood method [3] and are in the units of the number of base substitutions per site. This analysis involved 8 nucleotide sequences which were aligned using ClustalW. All ambiguous positions were removed for each sequence pair (pairwise deletion option). There were a total of 1503 positions in the final dataset. Evolutionary analyses were conducted in MEGA11 [4].

Following the hyphen, the sample type from which the corresponding *H. pylori* strain was isolated is shown.

1. Saitou, N.; Nei, M. The neighbor-joining method: A new method for reconstructing phylogenetic trees. *Molecular Biology and Evolution* **1987**, *4*, 406-425.
2. Felsenstein, J. Confidence limits on phylogenies: An approach using the bootstrap. *Evolution* **1985**, *39*, 783-791.
3. Tamura, K.; Nei, M.; Kumar, S. Prospects for inferring very large phylogenies by using the neighbor-joining method. *Proceedings of the National Academy of Sciences (USA)* **2004**, *101*, 11030-11035.
4. Tamura, K.; Stecher, G.; Kumar, S. MEGA 11: Molecular Evolutionary Genetics Analysis Version 11. *Molecular Biology and Evolution* **2021**, <https://doi.org/10.1093/molbev/msab120>.

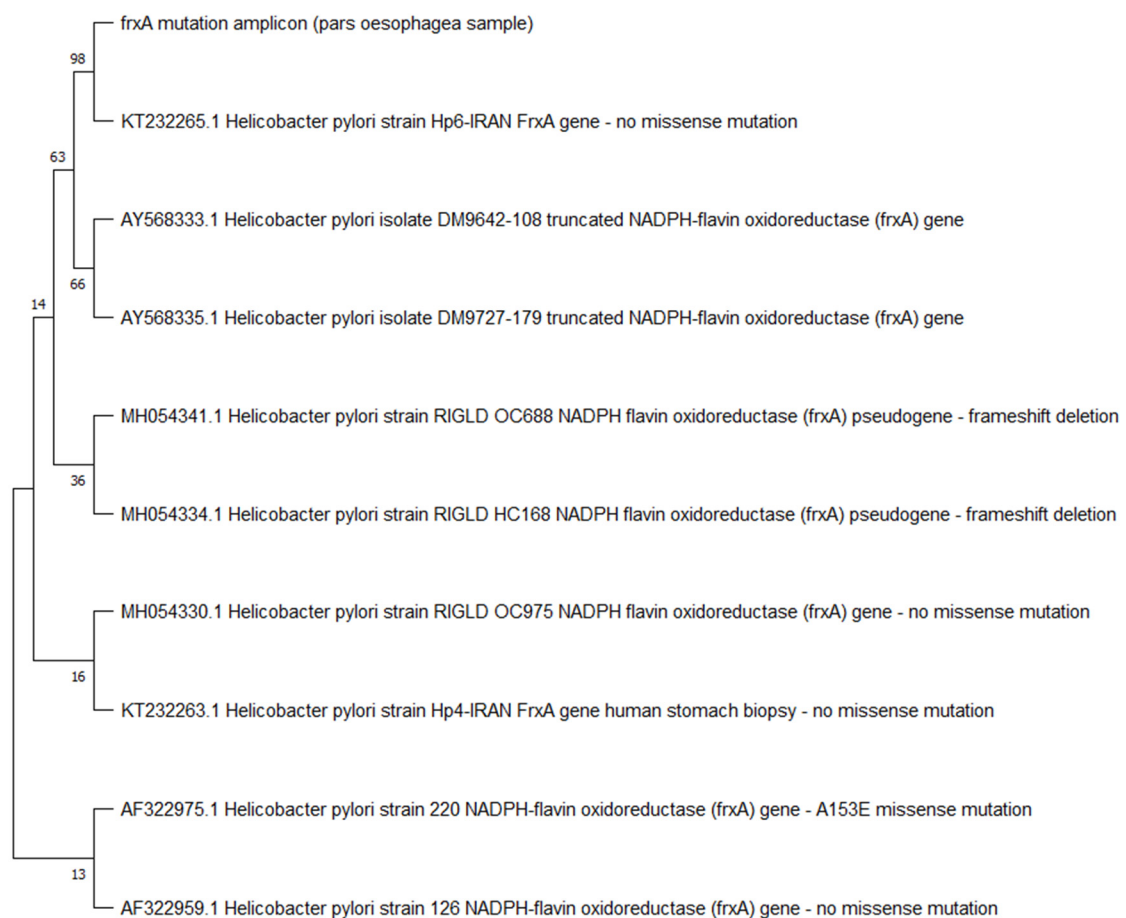

**Figure S11.** Phylogenetic tree based on comparison of *frxA* gene sequences.

The evolutionary history was inferred using the Neighbor-Joining method [1]. The bootstrap consensus tree inferred from 1000 replicates [2] is taken to represent the evolutionary history of the taxa analyzed [2]. Branches corresponding to partitions reproduced in less than 50% bootstrap replicates are collapsed. The percentage of replicate trees in which the associated taxa clustered together in the bootstrap test (1000 replicates) are shown next to the branches [2]. The evolutionary distances were computed using the Maximum Composite Likelihood method [3] and are in the units of the number of base substitutions per site. This analysis involved 10 nucleotide sequences which were aligned using ClustalW. All ambiguous positions were removed for each sequence pair (pairwise deletion option). There were a total of 735 positions in the final dataset. Evolutionary analyses were conducted in MEGA11 [4].

All reference strain sequences included, originated from *H. pylori* strains isolated from human gastric biopsy samples which showed metronidazole resistance with minimum inhibitory concentrations ranging from 16 to 256 mg/l. Following the hyphen, it is indicated what mutations were present in the reference strain sequences.

1. Saitou, N.; Nei, M. The neighbor-joining method: A new method for reconstructing phylogenetic trees. *Molecular Biology and Evolution* **1987**, *4*, 406-425.
2. Felsenstein, J. Confidence limits on phylogenies: An approach using the bootstrap. *Evolution* **1985**, *39*, 783-791.
3. Tamura, K.; Nei, M.; Kumar, S. Prospects for inferring very large phylogenies by using the neighbor-joining method. *Proceedings of the National Academy of Sciences (USA)* **2004**, *101*, 11030-11035.
4. Tamura, K.; Stecher, G.; Kumar, S. MEGA 11: Molecular Evolutionary Genetics Analysis Version 11. *Molecular Biology and Evolution* **2021**, <https://doi.org/10.1093/molbev/msab120>.



**Table S1.** Primer sequences used for detection of *Helicobacter pylori*(-like organisms) and thermocycling conditions in previous research

| Primer    | Sequence                        | Target gene | Amplicon size | Thermal cycle conditions |            |        | <i>Helicobacter</i> strain used as positive control | Result of samples included in current study |
|-----------|---------------------------------|-------------|---------------|--------------------------|------------|--------|-----------------------------------------------------|---------------------------------------------|
|           |                                 |             |               | Nr. Cycles               | Temp. (°C) | Time   |                                                     |                                             |
| BFHpyl_F1 | AAA gAg CgT ggT TTT CAT ggC g   | ureAB       | 217 bp        | 45                       | 94         | 30 sec | 26695                                               | Positive                                    |
| BFHpyl_R1 | ggg TTT TAC CgC CAC CgA ATT TAA |             |               |                          | 59         | 30 sec |                                                     |                                             |
|           |                                 |             |               |                          | 72         | 1 min  |                                                     |                                             |
| Hpy3F     | TTATCGGTAAAGACACC AGAAA         | glmM        | 144           | 45                       | 94         | 30 sec | SS1                                                 | Negative                                    |
| Hpy3R     | ATCACAGCGCATGTCTTC              |             |               |                          | 54         | 30 sec |                                                     |                                             |
|           |                                 |             |               |                          | 72         | 30 sec |                                                     |                                             |

From: Cortez Nunes, F.; Letra Mateus, T.; Taillieu, E.; Teixeira, S.; Carolino, N.; Rema, A.; De Bruyckere, S.; Gärtner, F.; Haesebrouck, F.; Amorim, I. Molecular detection of *Helicobacter* spp. and *Fusobacterium gastrois* in pigs and wild boars and its association with gastric histopathological alterations. *Vet Res* **2022**, 53, 78, doi:10.1186/s13567-022-01101-5.
